# Supplementary material for: Biological Control of Aedes albopictus: Obtained from the New Bacterial Candidates with Insecticidal Activity
Source: MDPI journal article supplement (doi:10.3390/insects11070403), 2020-06-29
Supplement: s1 [file s1]

**Table S1:** Dunn pairwise test's results. Comparison of insecticidal activity rates between the different isolated species and *Bti* (AM65-52).

| Mean rank |                                       | <i>Streptomyces</i><br>sp Sen 181 | <i>Streptomyces</i><br>sp Sen 43 | <i>Streptomyces</i><br>sp Sen 154 | <i>Streptomyces</i><br>sp Sen 86 | <i>Streptomyces</i><br>sp Sen 39 | <i>Brevibacillus</i><br><i>brevis</i> | <i>Bacillus</i><br><i>nealsonii</i> | <i>Micrococcus</i><br><i>luteus</i> | <i>Bacillus</i><br><i>pumilus</i> | <i>Bacillus</i><br><i>subtilis</i> | <i>Bacillus</i> sp. | <i>Bti</i> AM65-<br>52 |
|-----------|---------------------------------------|-----------------------------------|----------------------------------|-----------------------------------|----------------------------------|----------------------------------|---------------------------------------|-------------------------------------|-------------------------------------|-----------------------------------|------------------------------------|---------------------|------------------------|
|           | <i>Streptomyces</i><br>sp Sen 181     |                                   | 0,173                            | 0,041                             | < 0,0001                         | 0,002                            | 0,006                                 | < 0,0001                            | 0,017                               | 0,041                             | 0,173                              | 0,041               | 0,011                  |
|           | <i>Streptomyces</i><br>sp Sen 43      | -48,000                           |                                  | 0,001                             | < 0,0001                         | < 0,0001                         | 0,173                                 | < 0,0001                            | 0,307                               | 0,496                             | 1,000                              | 0,496               | < 0,0001               |
|           | <i>Streptomyces</i><br>sp Sen 154     | 72,000                            | 120,000                          |                                   | 0,061                            | 0,307                            | < 0,0001                              | < 0,0001                            | < 0,0001                            | < 0,0001                          | 0,001                              | < 0,0001            | 0,610                  |
|           | <i>Streptomyces</i><br>sp Sen 86      | 138,000                           | 186,000                          | 66,000                            |                                  | 0,395                            | < 0,0001                              | < 0,0001                            | < 0,0001                            | < 0,0001                          | < 0,0001                           | < 0,0001            | 0,173                  |
|           | <i>Streptomyces</i><br>sp Sen 39      | 108,000                           | 156,000                          | 36,000                            | -30,000                          |                                  | < 0,0001                              | < 0,0001                            | < 0,0001                            | < 0,0001                          | < 0,0001                           | < 0,0001            | 0,610                  |
|           | <i>Brevibacillus</i><br><i>brevis</i> | -96,000                           | -48,000                          | -168,000                          | -234,000                         | -204,000                         |                                       | < 0,0001                            | 0,734                               | 0,496                             | 0,173                              | 0,496               | < 0,0001               |
|           | <i>Bacillus</i><br><i>nealsonii</i>   | 312,000                           | 360,000                          | 240,000                           | 174,000                          | 204,000                          | 408,000                               |                                     | < 0,0001                            | < 0,0001                          | < 0,0001                           | < 0,0001            | < 0,0001               |
|           | <i>Micrococcus</i><br><i>luteus</i>   | -84,000                           | -36,000                          | -156,000                          | -222,000                         | -192,000                         | 12,000                                | -396,000                            |                                     | 0,734                             | 0,307                              | 0,734               | < 0,0001               |
|           | <i>Bacillus</i><br><i>pumilus</i>     | -72,000                           | -24,000                          | -144,000                          | -210,000                         | -180,000                         | 24,000                                | -384,000                            | 12,000                              |                                   | 0,496                              | 1,000               | < 0,0001               |
|           | <i>Bacillus</i><br><i>subtilis</i>    | -48,000                           | 0,000                            | -120,000                          | -186,000                         | -156,000                         | 48,000                                | -360,000                            | 36,000                              | 24,000                            |                                    | 0,496               | < 0,0001               |
|           | <i>Bacillus</i> sp.                   | -72,000                           | -24,000                          | -144,000                          | -210,000                         | -180,000                         | 24,000                                | -384,000                            | 12,000                              | 0,000                             | -24,000                            |                     | < 0,0001               |
|           | <i>Bti</i> AM65-<br>52                | 90,000                            | 138,000                          | 18,000                            | -48,000                          | -18,000                          | 186,000                               | -222,000                            | 174,000                             | 162,000                           | 138,000                            | 162,000             |                        |
