# Supplementary material for: Biological Control of Aedes albopictus: Obtained from the New Bacterial Candidates with Insecticidal Activity
Source: MDPI journal article supplement (doi:10.3390/insects11070403), 2020-06-29
Supplement: s1 [file s1]

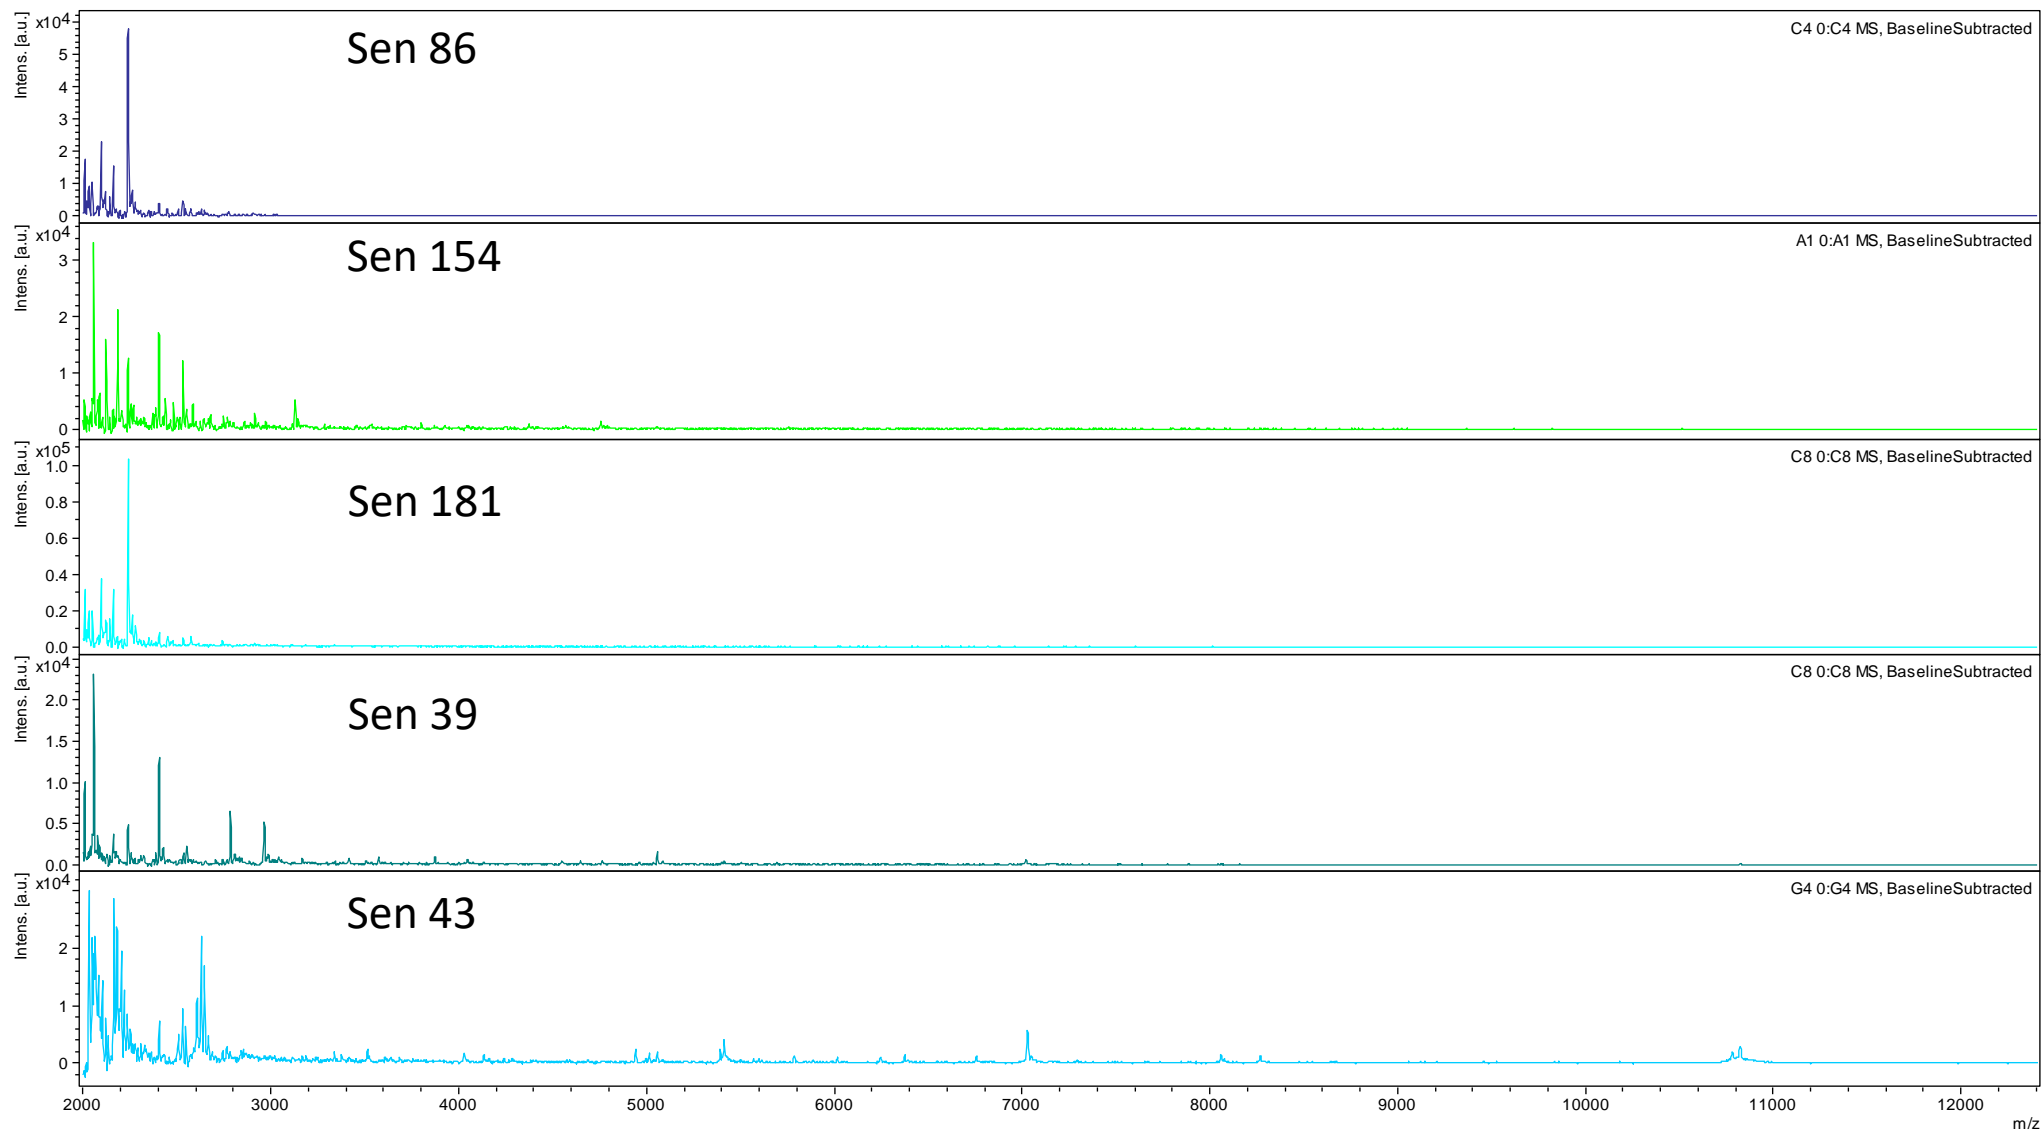

**Figure S1.** Analyses of the spectra obtained from the *Streptomyces* strains using MALDI Biotyper 3.0 software.
